# Supplementary material for: Public awareness and support for environmental protection—A focus on air pollution in peninsular Malaysia
Source: PLoS One. 2019 Mar 14;14(3):e0212206. doi: 10.1371/journal.pone.0212206 (PMC6417846; doi:10.1371/journal.pone.0212206)
Supplement: S3 File — (XLSX) [file pone.0212206.s003.xlsx]

## Sheet: Sheet1
Section A - Background information													Section B - Awareness on current atmospheric condition																			Section C - Attitudes towards environmental protection
A1	A2	A3	A4	A5	A6	A7	A8	A9	A10	A11	A12	A13	B1 (a)				B1 (b)	B2 (a)	B2 (b)		B3.1	B3.2	B3.3	B3.4	B3.5	B3.6	B3.7	B3.8	B3.9	0.342007	0.340777	C1	C2	C3	C4	C5	C6	C7	C8	C9	C10	C11	C12	C13	C14	C15	C16	C17	C18
How old are you?	What is your gender?	What is your ethnicity?	Where are you currently residing?	Do you have any children?	What is the highest educational level you have completed	What is your employment status?	If your answer above is Full time / Part time / Self-employed / Retired, what is (was) your sector of employment?	What is your household monthly income (people living together as a family and sharing finances)?	How many vehicles in total does your household own?	If you own a vehicle, what type of fuel do you normally use?	Do you / your family members have any respiratory disease / health condition which is caused by poor air quality?	Have you / your family members been hospitalized due to respiratory diseases before which is caused by poor air quality?	Industrial emissions	Motor vehicle emissions	Open burning	Haze episode	Please state if you think there are other factors	Overall, how would you rate the atmospheric condition at where you live?	Please describe the air quality more in details	4.08879	The Department of Environment (DOE) of Malaysia measures the country’s ambient air quality continuously (24 hours a day). T	According to the Compendium of Environment Statistics 2015, in year 2014, emission of pollutants to the atmosphere in Malaysia from industrial activity has increased as compared to 2010. F	Respiratory diseases were the leading cause of death among Malaysians. F	Vehicles which use diesel fuel emit nitrogen oxides but vehicles using gasoline as a fuel do not. F	The environmental protection expenditure for air media in Malaysia consists less than 50% of the total expenditure for all media (surface water, noise, air etc.) F	Severe haze episodes over the past few years were mostly caused by the burning of underground peatland soil. T	Malaysian Air Pollutant Index (API) standards are more stringent than World Health Organisation (WHO) guidelines.F	Air quality with API values exceeding 100 are considered likely to cause health effects to the general public. T	Malaysia is one of the nations which agreed to the ASEAN Agreement on Transboundary Haze Pollution to implement measures to prevent forest fires leading to haze.T	3.25981	3.26272	Taking care of the environment is something I really care about.	In order to protect the environment Malaysia needs economic growth.	I would contribute part of my income if I were certain that the money would be used to prevent atmospheric pollution.	The air quality in Malaysia is getting better because of modern science and technology.	Malaysians worry too much about industrial development polluting the atmosphere and degrading human’s health.	Educating younger generations about the knowledge of environmental protection (e.g. encourage carpool) is important.	Nothing can be done by me or my family / friends to improve the current atmospheric situation.	I do not mind an increase in taxes if the extra money is used to prevent further atmospheric pollution	Protecting the environment should be given priority, even if it causes slower economic growth and some loss of jobs.	I often cut back on driving a car for environmental reasons.	There is no point in doing what I can for the environment unless everyone does the same.	Haze is a fair price to pay for economic development.	I do not mind paying more money to use better quality gasoline which leads to less pollution.	The economic growth of Malaysia is currently more important than environmental protection.	I am willing to accept cuts in my standard of living in order to protect the environment.	Air pollution caused by cars is extremely dangerous for health.	I have confidence that the air quality in Malaysia will improve before Wawasan 2020.	Malaysia government has to reduce atmospheric pollution but it should not cost me any money.
													3	1	4	2		Somewhat polluted but causes no harm		3.4	1	-0.2	1	0	-0.2	-0.2	0	1	1	3.4	3.44444	5	2	4	3	4	5	4	3	3	2	4	4	4	2	4	4	3	2
													4	2	1	3		Somewhat polluted and causes harm		0.6	0	-0.2	0	0	1	-0.2	0	0	0	3.4	3.38889	4	2	5	3	4	5	3	2	2	3	4	2	4	3	4	4	3	4
													4	2	1	3		Somewhat polluted but causes no harm		3.2	-0.2	-0.2	-0.2	1	-0.2	1	1	1	0	3.3	3.27778	4	5	3	1	5	5	5	3	4	2	2	5	3	4	2	4	1	1
													1	4	2	3		Somewhat polluted and causes harm		4.6	1	-0.2	1	0	0	-0.2	1	1	1	4	4	1	3	1	1	5	5	5	5	5	4	5	5	5	5	5	5	3	4
													3	4	2	1		Somewhat polluted and causes harm		6.6	1	-0.2	1	1	1	-0.2	1	1	1	3.2	3.22222	4	2	4	4	3	4	4	2	4	3	2	2	4	2	4	4	4	2
													4	3	2	1		Somewhat polluted but causes no harm	Medium	2.6	0	0	-0.2	-0.2	0	0	1	1	1	3.1	3.11111	4	2	3	3	2	5	2	3	4	3	4	2	3	3	4	4	3	2
													2	1	4	3		Somewhat polluted but causes no harm		1.4	0	-0.2	1	0	0	-0.2	0	-0.2	1	3.4	3.44444	4	3	4	2	4	5	4	3	3	3	4	3	3	3	4	4	3	3
													1	3	2	4		Somewhat polluted and causes harm		3	-0.2	-0.2	-0.2	1	1	1	-0.2	-0.2	1	3.1	3.11111	3	3	2	4	4	4	4	3	4	2	3	2	3	3	2	4	2	4
													4	2	3	1		Somewhat polluted but causes no harm		6.6	1	-0.2	1	1	-0.2	1	1	1	1	3	3	3	2	3	3	2	4	3	2	4	3	4	4	3	3	3	3	3	2
													1	2	3	4		Somewhat polluted but causes no harm		5.4	1	1	1	1	-0.2	-0.2	-0.2	1	1	3.4	3.44444	4	4	3	2	5	4	4	2	4	2	4	4	4	4	4	4	2	2
													4	3	2	1		Somewhat polluted and causes harm		4.2	-0.2	-0.2	-0.2	1	1	1	1	1	-0.2	3.5	3.5	4	2	5	3	3	4	4	4	4	4	4	3	4	2	3	4	2	4
													1	4	2	3		Somewhat polluted but causes no harm		3.4	1	-0.2	1	-0.2	0	1	0	-0.2	1	3.8	3.83333	5	4	4	3	4	5	5	4	5	4	5	4	3	2	4	4	3	1
													2	4	1	3		Somewhat polluted but causes no harm	N/A	2.6	-0.2	0	0	0	-0.2	1	0	1	1	2.9	2.94444	4	3	4	3	2	4	2	4	3	3	4	2	2	4	2	3	2	2
													1	2	3	4		Somewhat polluted and causes harm		9	1	1	1	1	1	1	1	1	1	3.8	3.83333	5	4	4	4	5	5	5	4	4	2	2	4	4	4	4	4	3	2
													3	4	2	1		Somewhat polluted but causes no harm	hazy weather	3.4	-0.2	-0.2	0	1	0	-0.2	1	1	1	2.9	2.88889	4	5	2	1	3	4	4	2	3	2	4	2	3	2	3	4	1	3
													1	3	2	4		Somewhat polluted but causes no harm		6.8	1	-0.2	1	1	0	1	1	1	1	3.3	3.33333	3	2	4	2	4	4	4	3	4	3	4	4	4	3	4	3	2	3
													4	3	2	1		Somewhat polluted but causes no harm		4.2	-0.2	-0.2	-0.2	1	-0.2	1	1	1	1	3.6	3.61111	5	4	4	1	3	5	3	1	4	4	5	4	3	4	4	5	3	3
													2	1	3	4		Somewhat polluted but causes no harm		1.8	0	-0.2	0	0	0	1	0	1	0	3.1	3.11111	4	2	4	3	2	5	4	2	2	3	3	4	3	3	3	3	3	3
													3	2	4	1		Somewhat polluted but causes no harm	Every night there's burning smell, but the source of the gas emission is not known. My home is very near to industrial area hence gas emission from factories is very likely.	3.4	1	-0.2	1	-0.2	0	-0.2	0	1	1	3.4	3.38889	5	3	4	2	4	5	5	2	3	2	4	3	4	4	3	4	2	2
													2	1	3	4		Somewhat polluted but causes no harm		5.4	1	-0.2	1	1	-0.2	1	1	-0.2	1	2.9	2.88889	4	2	2	2	4	4	4	2	2	2	4	4	4	4	2	3	2	1
													2	1	4	3		Somewhat polluted but causes no harm		4.8	1	-0.2	0	1	1	1	1	0	0	3.4	3.38889	4	2	3	3	4	5	4	3	3	2	3	3	4	4	3	4	3	4
													3	4	2	1		Somewhat polluted but causes no harm		1.6	-0.2	0	-0.2	0	0	1	0	1	0	3.5	3.5	5	4	5	2	2	5	5	4	4	2	3	2	3	4	4	4	2	3
													1	2	4	3		Somewhat polluted but causes no harm		0.4	-0.2	0	-0.2	0	0	-0.2	0	0	1	3.2	3.16667	5	1	5	4	4	5	2	3	4	2	4	4	3	2	3	2	2	2
													2	3	1	4		Somewhat polluted and causes harm		0	0	0	0	0	0	0	0	0	0	3.2	3.16667	4	2	3	2	3	3	4	3	3	2	4	3	4	4	4	4	2	3
													3	2	4	1		Somewhat polluted and causes harm	The air quality is especially terrible whenever there's haze from Indonesia l. However, I wouldn't say that the air quality is good at the period without haze from Indonesia. It's easy to spot some people burning things. Comparing with other factors, in my belief, open burning contributes less to air polutions but it will cause uncomfort to the people living around the area.	4.6	1	-0.2	1	1	-0.2	1	0	0	1	3.6	3.61111	5	4	4	2	5	5	5	3	3	2	5	1	5	3	4	4	1	4
													4	3	1	2		Severely polluted		3	-0.2	-0.2	-0.2	1	1	-0.2	1	-0.2	1	3.9	3.88889	5	2	5	4	2	5	4	5	4	4	5	2	5	1	5	4	4	4
													3	2	1	4		Somewhat polluted but causes no harm		5.6	-0.2	-0.2	1	1	0	1	1	1	1	3.1	3.11111	4	2	4	3	4	5	4	3	2	2	4	4	3	2	3	3	1	3
													2	1	3	4		Somewhat polluted and causes harm		3.4	1	-0.2	0	0	-0.2	1	-0.2	1	1	2.9	2.94444	4	2	2	2	4	4	3	5	3	3	2	2	3	2	3	4	2	3
													2	1	4	3		Somewhat polluted and causes harm		2	-0.2	-0.2	-0.2	-0.2	-0.2	0	1	1	1	2.8	2.77778	5	1	4	2	1	5	3	1	2	2	2	2	4	4	2	5	2	3
													4	3	1	2		Somewhat polluted and causes harm	Periodically cause harm due to the haze derived from neighbour country.	4.2	1	-0.2	1	1	-0.2	-0.2	1	-0.2	1	3.6	3.55556	4	5	4	2	5	5	5	2	3	2	4	4	3	3	4	4	2	3
													3	2	1	4		Somewhat polluted but causes no harm		2.4	-0.2	0	0	0	-0.2	-0.2	1	1	1	2.9	2.88889	4	2	3	2	4	4	4	2	3	3	2	4	3	2	2	4	2	2
													4	3	2	1		Somewhat polluted and causes harm		3.2	-0.2	-0.2	-0.2	0	-0.2	1	1	1	1	2.7	2.72222	4	2	1	1	5	5	4	4	4	2	1	4	2	2	3	3	1	1
													1	4	2	3		Not polluted at all		3.4	1	-0.2	1	0	1	1	-0.2	-0.2	0	2.8	2.83333	3	1	3	3	4	1	5	3	3	3	4	2	4	2	4	1	1	4
													3	2	4	1		Somewhat polluted but causes no harm	If depends the forecast weather , Indeed after rain , the air will be getting fresher with more Negative ion	5.4	-0.2	-0.2	1	1	-0.2	1	1	1	1	3.4	3.44444	5	1	4	1	3	5	5	3	3	3	5	2	4	4	4	4	3	3
													3	2	1	4		Somewhat polluted but causes no harm		3	-0.2	-0.2	1	-0.2	-0.2	1	-0.2	1	1	3.2	3.22222	5	2	3	2	2	5	4	3	5	3	4	2	3	4	2	4	4	1
													3	2	4	1		Somewhat polluted and causes harm	Dusty and noisy as our house is along the main road.	3.6	0	-0.2	0	0	-0.2	1	1	1	1	3.4	3.44444	4	3	3	2	4	5	4	3	4	3	4	1	4	4	4	4	3	3
													1	3	2	4		Severely polluted	Dirty	1.4	0	-0.2	-0.2	-0.2	0	1	0	1	0	3.6	3.55556	4	2	4	2	2	5	5	4	3	4	4	2	4	5	5	5	1	3
													4	3	1	2		Somewhat polluted but causes no harm		0.2	0	-0.2	0	0	-0.2	-0.2	1	-0.2	0	3.1	3.11111	4	2	5	2	3	5	4	4	3	2	4	2	3	1	4	4	2	2
													1	4	3	2		Somewhat polluted and causes harm		5.4	-0.2	-0.2	-0.2	1	1	1	1	1	1	3.3	3.27778	5	1	5	2	5	5	4	1	3	3	2	1	5	1	5	5	3	3
													1	2	3	4		Somewhat polluted but causes no harm	Open burning	1.2	-0.2	1	0	0	-0.2	-0.2	0	-0.2	1	3.1	3.11111	3	3	4	3	2	3	2	3	3	4	3	3	4	3	4	3	3	3
													4	2	1	3		Somewhat polluted but causes no harm	smoky	1.6	0	0	-0.2	1	1	0	0	-0.2	0	2.7	2.66667	4	1	3	3	3	4	4	2	4	2	3	2	2	2	2	3	1	3
													4	1	2	3		Somewhat polluted but causes no harm		4.2	1	-0.2	1	-0.2	-0.2	-0.2	1	1	1	3.3	3.27778	5	1	5	2	4	5	3	2	4	3	2	2	4	3	4	4	3	3
													3	2	1	4		Not polluted at all		3	1	-0.2	-0.2	-0.2	-0.2	1	-0.2	1	1	3.3	3.33333	5	1	4	4	2	5	4	4	4	4	2	1	4	2	4	4	4	2
													2	4	1	3		Somewhat polluted but causes no harm	3 months a year with PSI between 80 and 120	3.2	1	-0.2	-0.2	-0.2	-0.2	0	1	1	1	3.9	3.94444	4	4	4	4	2	4	5	4	4	2	4	5	4	5	4	4	4	4
													3	4	2	1		Somewhat polluted but causes no harm		5.6	1	-0.2	0	1	-0.2	1	1	1	1	4	4	5	3	1	4	5	5	4	4	5	4	4	5	4	5	4	4	3	3
													4	1	3	2		Somewhat polluted but causes no harm		4.2	-0.2	-0.2	-0.2	1	-0.2	1	1	1	1	3.1	3.11111	4	4	4	2	4	5	4	2	3	3	4	4	2	4	2	2	1	2
													1	2	4	3		Somewhat polluted and causes harm		5.8	-0.2	0	1	1	0	1	1	1	1	3.6	3.55556	4	2	4	2	5	4	3	3	4	4	4	4	4	4	4	4	2	3
													4	3	1	2		Somewhat polluted but causes no harm		4.2	1	-0.2	-0.2	-0.2	-0.2	1	1	1	1	2.8	2.77778	5	2	4	2	4	5	1	4	4	2	1	2	4	1	4	2	2	1
													3	1	4	2		Somewhat polluted but causes no harm		4.4	0	-0.2	1	1	1	1	-0.2	1	-0.2	3.4	3.44444	5	2	3	4	5	5	4	2	5	3	5	1	4	4	3	2	2	3
													3	2	1	4		Somewhat polluted but causes no harm		1.8	1	-0.2	1	-0.2	-0.2	-0.2	-0.2	1	-0.2	3.1	3.05556	5	2	1	1	4	5	2	1	5	4	2	4	4	5	2	4	2	2
													3	1	2	4		Somewhat polluted but causes no harm		4.2	1	-0.2	1	-0.2	-0.2	-0.2	1	1	1	3.6	3.55556	4	2	4	2	4	4	4	4	4	4	2	4	4	4	4	4	4	2
													1	3	2	4		Not polluted at all		2.8	1	0	0	-0.2	0	1	0	1	0	2.8	2.77778	4	2	4	2	2	4	4	2	3	2	2	3	3	2	3	3	2	3
													3	4	1	2		Somewhat polluted but causes no harm		3	1	0	0	1	0	0	0	1	0	2.9	2.88889	4	1	3	3	4	5	4	2	2	2	1	5	4	1	4	5	1	1
													1	3	2	4		Somewhat polluted but causes no harm		5.4	1	-0.2	1	-0.2	-0.2	1	1	1	1	3.3	3.27778	5	3	4	1	5	4	4	4	4	3	4	4	3	3	4	2	1	1
													3	4	2	1		Somewhat polluted and causes harm		1.8	1	0	-0.2	0	0	0	0	1	0	3.7	3.66667	4	2	4	5	2	5	4	2	5	3	5	5	3	4	3	5	1	4
													4	1	2	3		Not polluted at all	Air is fresh except when there is haze annually	3	1	-0.2	-0.2	1	-0.2	1	-0.2	-0.2	1	3.9	3.88889	4	4	4	3	4	5	4	4	4	2	3	5	4	5	4	4	3	4
													2	1	3	4		Somewhat polluted but causes no harm		5.6	1	-0.2	1	1	1	-0.2	0	1	1	3.3	3.33333	3	5	3	2	5	5	3	5	2	3	2	4	2	2	5	4	1	4
													2	3	1	4		Somewhat polluted but causes no harm		5.8	1	-0.2	1	1	0	0	1	1	1	2.9	2.94444	3	4	3	1	4	3	4	3	3	2	4	4	3	3	3	2	2	2
													3	2	1	4		Somewhat polluted but causes no harm		6.6	-0.2	1	1	1	-0.2	1	1	1	1	3.8	3.77778	5	3	1	1	5	5	5	5	5	5	5	3	5	5	5	3	1	1
													4	3	1	2		Not polluted at all	The air is clear and no smell	3.4	1	-0.2	1	0	-0.2	0	-0.2	1	1	3.2	3.16667	4	1	4	3	4	4	4	2	3	2	4	2	3	4	3	4	4	2
													2	1	4	3		Somewhat polluted and causes harm	It can be clearly observed that, especially during peak working hours in the morning and evening, the visibility is low and the air is filled with dust as well as emissions from vehicles.	4.4	1	-0.2	1	1	-0.2	1	-0.2	0	1	3.9	3.94444	5	4	5	4	4	5	5	5	2	2	5	4	2	4	5	3	4	3
													2	1	3	4		Somewhat polluted but causes no harm	sometimes burning of items happened	2.6	1	-0.2	0	0	0	1	1	-0.2	0	3.7	3.72222	5	3	4	2	4	5	5	4	3	3	4	3	3	3	4	4	4	4
													4	3	1	2		Somewhat polluted and causes harm	Bad	3	-0.2	-0.2	-0.2	1	-0.2	-0.2	1	1	1	3.2	3.22222	4	2	4	2	4	5	2	2	4	4	2	4	4	4	4	4	2	1
													1	2	3	4		Somewhat polluted but causes no harm		5.4	-0.2	-0.2	1	1	1	-0.2	1	1	1	3	3	4	2	3	1	4	2	5	3	3	2	5	2	4	2	3	5	1	3
													3	2	1	4		Somewhat polluted but causes no harm	Acceptable lever	6.6	-0.2	-0.2	1	1	1	1	1	1	1	3.5	3.5	5	4	1	1	5	5	5	1	4	5	2	5	1	5	4	4	1	5
													3	4	1	2		Somewhat polluted and causes harm	The environment is mostly congested with cars which emit lot of smoke from their exhaust pipe (near my university hostel at Sunway)	4	0	0	1	0	0	1	1	1	0	3.3	3.27778	4	2	3	2	4	4	5	2	4	3	4	3	3	2	3	5	3	3
													4	1	3	2		Somewhat polluted but causes no harm	Hard to breathe when there is a lot of cars on the road.	3.2	1	-0.2	-0.2	1	0	-0.2	-0.2	1	1	3.1	3.11111	4	2	3	2	4	5	4	2	4	3	2	4	3	2	4	3	2	3
													1	2	3	4		Somewhat polluted and causes harm		4.4	1	-0.2	0	1	1	1	1	-0.2	-0.2	3	3	3	2	3	2	3	5	4	2	2	3	2	2	4	4	3	3	4	3
													3	2	1	4		Somewhat polluted but causes no harm		1.8	0	-0.2	1	0	0	0	0	1	0	3.4	3.38889	4	4	3	2	3	5	4	2	2	4	4	4	4	3	3	3	4	3
													3	2	1	4		Somewhat polluted and causes harm	We have construction sites near where I live that causes a lot of dust particles....construction goes on through the night.	6.6	1	-0.2	1	1	-0.2	1	1	1	1	3.6	3.55556	4	2	4	2	4	4	4	3	4	4	2	4	4	4	4	4	3	4
													1	2	3	4		Not polluted at all	The air quality where I live in is fairly good It's a small residential area with no industries around	6.6	1	-0.2	1	1	-0.2	1	1	1	1	3.6	3.55556	4	2	4	3	4	5	4	2	4	3	4	4	4	4	4	4	2	3
													3	4	2	1		Somewhat polluted but causes no harm		3.8	0	0	1	1	0	1	0	-0.2	1	2.9	2.94444	4	2	2	3	3	3	3	3	3	3	3	3	3	3	3	3	3	3
													4	2	3	1		Somewhat polluted and causes harm		1.2	1	-0.2	-0.2	-0.2	0	1	-0.2	0	0	3.4	3.38889	5	2	4	2	1	5	4	4	3	4	2	3	4	3	4	4	5	2
													2	3	4	1		Somewhat polluted but causes no harm	I believe : 1. The living space near a new housing area may b impacted by the dust from the construction works carried out in the vicinity, 2. The saving grace is the vast green foliage from plants which traps and rejuvenates the air quality.	4.4	1	-0.2	-0.2	0	-0.2	1	1	1	1	3.4	3.44444	4	4	4	3	4	4	4	3	4	3	4	4	3	3	3	4	3	1
													2	1	4	3		Somewhat polluted but causes no harm		1.6	0	-0.2	1	1	0	0	0	-0.2	0	3.6	3.61111	4	4	4	4	3	5	5	4	2	3	4	4	4	3	3	3	3	3
													1	2	3	4		Not polluted at all	I am living in a campus with lots of greenery . Thus the pollution level is very minimal /negligible .	4.6	-0.2	0	1	1	0	-0.2	1	1	1	3.5	3.5	4	4	4	3	2	4	4	3	4	4	3	4	4	5	4	3	1	3
													4	3	1	2		Severely polluted	AQI is quite bad and visibility range is consider low at times.	3.4	1	-0.2	1	0	-0.2	0	-0.2	1	1	3.3	3.27778	5	2	4	5	1	5	3	1	3	4	1	2	5	3	3	5	4	3
													4	3	1	2		Somewhat polluted and causes harm	#REF!	0	0	0	0	0	0	0	0	0	0	4	4	4	4	4	3	3	4	4	4	5	5	4	3	5	4	4	4	4	4
													4	3	1	2		Somewhat polluted and causes harm		1.6	0	-0.2	-0.2	0	0	1	0	0	1	3.9	3.94444	5	3	3	3	2	5	5	4	4	4	5	5	4	4	4	4	4	3
													4	3	1	2		Somewhat polluted and causes harm		5.4	-0.2	-0.2	1	1	-0.2	1	1	1	1	3.9	3.88889	4	2	4	2	5	5	5	4	5	2	4	5	4	5	4	4	2	4
													1	2	3	4		Severely polluted		1.8	-0.2	-0.2	-0.2	-0.2	-0.2	1	-0.2	1	1	2.6	2.55556	1	5	1	1	5	1	5	1	1	1	5	5	1	5	1	1	1	5
													3	4	1	2		Severely polluted		7.8	1	-0.2	1	1	1	1	1	1	1	3.4	3.38889	5	1	3	5	1	5	3	5	5	3	2	5	5	1	1	5	5	1
													2	1	4	3		Somewhat polluted and causes harm		1.8	-0.2	-0.2	-0.2	-0.2	-0.2	-0.2	1	1	1	4	4	4	2	4	4	4	5	5	4	5	2	5	4	4	4	4	5	4	3
													2	1	3	4		Somewhat polluted but causes no harm		1.8	1	-0.2	1	-0.2	-0.2	-0.2	-0.2	1	-0.2	3.1	3.11111	4	3	2	2	4	4	4	2	4	2	5	4	1	4	2	2	4	3
													2	1	3	4		Somewhat polluted but causes no harm		5.4	-0.2	-0.2	1	-0.2	1	1	1	1	1	3.2	3.22222	4	4	3	4	4	3	4	4	4	3	2	2	3	2	3	4	2	3
													2	3	4	1		Somewhat polluted but causes no harm		1.4	1	-0.2	-0.2	0	0	-0.2	0	1	0	3.8	3.77778	4	2	4	3	4	5	4	3	3	5	5	5	3	5	4	4	3	2
													2	1	3	4		Somewhat polluted but causes no harm		5.4	-0.2	-0.2	1	-0.2	1	1	1	1	1	3.5	3.5	4	3	2	2	3	4	4	4	4	2	4	4	4	4	4	4	3	4
													1	2	4	3		Somewhat polluted but causes no harm		4.2	-0.2	-0.2	1	-0.2	-0.2	1	1	1	1	3.4	3.44444	4	3	3	4	4	5	4	2	2	2	4	4	4	3	4	5	2	3
													3	4	1	2		Somewhat polluted but causes no harm		6.6	1	-0.2	1	1	-0.2	1	1	1	1	3.3	3.27778	5	1	3	2	3	5	4	4	5	3	3	5	4	2	2	4	2	2
													2	1	3	4		Somewhat polluted but causes no harm		4.2	-0.2	-0.2	1	-0.2	-0.2	1	1	1	1	3.5	3.5	4	2	5	4	3	5	2	4	5	3	2	2	5	1	4	4	5	3
													2	1	3	4		Somewhat polluted and causes harm		4.2	-0.2	-0.2	1	-0.2	-0.2	1	1	1	1	3	3	4	1	4	4	3	5	3	3	5	3	1	2	3	1	2	3	5	2
													2	1	3	4		Somewhat polluted but causes no harm		4.2	-0.2	-0.2	1	-0.2	-0.2	1	1	1	1	3	3	4	2	2	4	2	5	4	4	5	3	1	1	3	1	3	4	5	1
													2	1	4	3		Not polluted at all		3	1	-0.2	-0.2	-0.2	-0.2	1	-0.2	1	1	3.2	3.22222	5	2	4	4	3	5	2	3	4	4	1	2	3	1	4	5	4	2
													2	1	3	4		Somewhat polluted and causes harm		4.2	-0.2	-0.2	1	-0.2	-0.2	1	1	1	1	3.2	3.22222	4	2	4	5	3	2	3	4	4	4	1	3	4	2	5	2	4	2
													2	1	3	4		Somewhat polluted but causes no harm		5.4	-0.2	-0.2	1	-0.2	1	1	1	1	1	3.6	3.55556	4	4	4	2	4	4	4	2	4	4	4	4	4	2	2	4	4	4
													2	1	3	4		Somewhat polluted but causes no harm		4.2	-0.2	-0.2	1	-0.2	-0.2	1	1	1	1	2.8	2.83333	4	1	3	4	3	5	4	3	2	2	1	1	3	1	3	4	4	3
													2	1	3	4		Somewhat polluted and causes harm		6.6	1	1	1	1	-0.2	-0.2	1	1	1	3.6	3.61111	4	2	4	4	4	4	4	4	3	2	4	4	4	4	4	5	3	2
													1	2	4	3		Somewhat polluted but causes no harm		6.6	-0.2	1	-0.2	1	1	1	1	1	1	2.9	2.94444	4	2	3	4	4	2	4	2	4	2	2	2	4	2	3	4	3	2
													2	1	3	4		Somewhat polluted but causes no harm		4.2	-0.2	-0.2	1	-0.2	-0.2	1	1	1	1	3.4	3.44444	5	1	4	5	3	5	3	3	5	4	1	2	4	1	5	5	4	2
													2	1	3	4		Somewhat polluted but causes no harm		5.4	-0.2	-0.2	-0.2	1	1	1	1	1	1	3.1	3.05556	4	2	4	4	4	4	2	3	2	2	2	4	4	2	3	4	3	2
													2	1	4	3		Somewhat polluted but causes no harm		5.4	-0.2	-0.2	1	-0.2	1	1	1	1	1	3	3	4	2	2	3	4	5	3	2	4	3	4	2	3	1	3	2	3	4
													3	4	2	1		Somewhat polluted but causes no harm		5.4	-0.2	-0.2	1	1	1	-0.2	1	1	1	3.6	3.55556	5	4	5	2	4	5	4	4	2	2	4	5	4	2	4	3	2	3
													2	1	3	4		Somewhat polluted but causes no harm		3	1	-0.2	-0.2	1	-0.2	1	-0.2	-0.2	1	3.3	3.27778	3	2	4	4	2	3	1	5	4	5	2	2	5	2	4	4	5	2
													2	1	3	4		Not polluted at all		5.4	1	-0.2	1	1	-0.2	1	1	-0.2	1	2.9	2.94444	3	2	5	1	4	3	2	5	1	2	3	2	5	5	2	3	4	1
													2	1	3	4		Somewhat polluted and causes harm		6.6	1	-0.2	1	1	-0.2	1	1	1	1	3	3	2	3	4	5	5	2	3	4	5	1	4	3	4	1	1	2	3	2
													2	1	3	4		Somewhat polluted and causes harm		6.6	1	-0.2	1	1	1	-0.2	1	1	1	2.6	2.61111	4	1	1	2	3	4	1	1	2	3	2	1	1	4	3	4	5	5
													2	1	3	4		Somewhat polluted and causes harm		6.6	1	-0.2	1	1	-0.2	1	1	1	1	3.1	3.05556	1	4	3	4	1	1	4	3	4	5	5	4	3	2	5	1	2	3
													2	1	3	4		Somewhat polluted but causes no harm		3	-0.2	-0.2	1	1	-0.2	-0.2	1	1	-0.2	2.8	2.77778	4	3	4	2	3	4	3	2	2	2	4	2	3	3	2	2	3	2
													2	1	3	4		Somewhat polluted but causes no harm		1.8	-0.2	-0.2	1	-0.2	-0.2	-0.2	1	1	-0.2	2.8	2.77778	3	2	4	2	4	5	4	3	2	2	2	2	3	2	2	4	2	2
													2	1	3	4		Somewhat polluted and causes harm		5.4	-0.2	-0.2	1	1	-0.2	1	1	1	1	3.4	3.38889	5	5	2	3	2	5	5	2	3	4	1	5	2	3	4	5	1	4
													2	1	3	4		Not polluted at all		5.4	1	-0.2	-0.2	1	-0.2	1	1	1	1	3	3	2	3	4	5	5	2	3	4	5	1	4	3	4	1	1	2	3	2
													2	1	3	4		Somewhat polluted and causes harm		6.6	1	-0.2	1	1	-0.2	1	1	1	1	3.5	3.5	2	3	4	5	5	2	3	4	5	5	5	4	3	2	5	1	2	3
													2	1	3	4		Somewhat polluted but causes no harm		4.2	-0.2	-0.2	1	-0.2	-0.2	1	1	1	1	2.9	2.88889	4	2	3	5	1	4	1	4	1	2	2	2	4	1	4	5	4	3
													2	1	3	4		Not polluted at all		4.2	1	-0.2	1	-0.2	-0.2	-0.2	1	1	1	2.6	2.61111	4	1	1	2	3	4	1	1	2	3	2	1	1	4	3	4	5	5
													2	1	3	4		Somewhat polluted but causes no harm		3	-0.2	-0.2	1	-0.2	-0.2	1	1	-0.2	1	3.2	3.16667	5	1	4	4	1	2	2	4	3	5	5	2	4	1	5	4	4	1
													2	1	3	4		Somewhat polluted but causes no harm		4.2	-0.2	-0.2	1	-0.2	-0.2	1	1	1	1	3.3	3.27778	5	1	4	5	2	5	2	4	5	4	1	2	4	1	4	5	4	1
													2	1	3	4		Severely polluted		4.2	1	1	-0.2	1	-0.2	1	-0.2	-0.2	1	2.9	2.88889	4	4	3	4	2	5	1	4	4	5	1	1	3	2	2	1	3	3
													2	1	4	3		Somewhat polluted but causes no harm		3.2	0	-0.2	-0.2	1	-0.2	1	1	-0.2	1	3.3	3.33333	3	2	5	4	2	4	3	4	5	5	2	2	2	3	5	4	4	1
													2	1	3	4		Somewhat polluted and causes harm	Polluted to the point where its impossible to get a breath of fresh air(like in suburban areas) but not to the point where our it obstructs our vision, especially for driving, unless its haze	5.6	1	-0.2	1	1	0	1	1	-0.2	1	3.8	3.83333	4	4	4	3	4	5	5	4	3	2	4	5	4	4	3	4	3	4
													3	1	2	4		Somewhat polluted but causes no harm		5.6	-0.2	-0.2	1	1	0	1	1	1	1	2.9	2.94444	4	2	4	2	4	4	4	2	3	2	2	4	2	2	4	4	2	2
													4	3	2	1		Somewhat polluted but causes no harm		5.4	1	-0.2	1	-0.2	-0.2	1	1	1	1	3.4	3.44444	4	3	4	2	3	5	5	4	2	3	4	4	4	4	3	3	2	3
													2	1	3	4		Somewhat polluted and causes harm		4.2	-0.2	-0.2	1	-0.2	-0.2	1	1	1	1	3.1	3.05556	4	3	4	3	2	5	1	4	4	3	1	2	4	1	3	4	4	3
													3	4	1	2		Somewhat polluted but causes no harm		6.6	1	-0.2	1	1	-0.2	1	1	1	1	3.3	3.33333	5	3	2	2	4	5	4	4	2	2	5	5	4	2	3	4	2	2
													2	1	3	4		Somewhat polluted but causes no harm		5.4	-0.2	-0.2	1	-0.2	1	1	1	1	1	3.9	3.94444	4	2	4	4	5	5	5	4	4	3	4	4	4	4	4	5	3	3
													2	1	4	3		Somewhat polluted but causes no harm	As I live near a forested area, the air is generally cleaner than in city centre. Haze is not as bad.	6.6	1	-0.2	1	1	-0.2	1	1	1	1	3.5	3.5	4	2	4	1	5	5	4	4	4	4	2	4	4	4	4	5	1	2
													2	3	4	1		Somewhat polluted but causes no harm		4.2	-0.2	-0.2	1	1	-0.2	-0.2	1	1	1	3.7	3.72222	5	2	4	2	4	5	3	3	4	4	5	5	4	4	4	5	2	2
													2	1	3	4		Somewhat polluted and causes harm		5.4	-0.2	-0.2	1	-0.2	1	1	1	1	1	2.8	2.77778	3	4	4	2	3	2	2	2	2	4	2	3	2	2	3	2	4	4
													2	1	4	3		Somewhat polluted but causes no harm		3	-0.2	-0.2	1	-0.2	1	-0.2	-0.2	1	1	2.6	2.61111	4	2	3	2	4	4	4	3	3	2	1	3	2	2	3	2	1	2
													4	1	3	2		Somewhat polluted but causes no harm		1	0	0	0	0	0	0	0	1	0	3.2	3.16667	4	3	3	2	4	4	4	3	3	3	3	5	3	3	3	3	1	3
													1	3	2	4		Somewhat polluted and causes harm	-	5.8	1	0	1	0	1	1	1	-0.2	1	3.3	3.33333	4	3	4	1	4	5	5	3	5	4	2	2	4	2	4	4	1	3
													4	1	2	3		Somewhat polluted but causes no harm	Occasionally I can smell smoke from open burning & fuels from petrol.	4.4	-0.2	-0.2	1	1	0	-0.2	1	1	1	2.9	2.88889	5	4	5	2	3	5	5	2	2	2	4	2	3	2	1	2	1	2
													3	4	1	2		Somewhat polluted and causes harm		4.2	-0.2	-0.2	1	1	-0.2	1	1	-0.2	1	3.9	3.94444	5	2	4	4	4	5	5	3	3	4	4	5	4	5	4	3	3	4
													3	2	1	4		Somewhat polluted but causes no harm	Haze is the most impact	6.6	-0.2	-0.2	1	1	1	1	1	1	1	3.4	3.44444	4	3	4	3	4	5	5	1	5	3	4	5	4	3	3	3	2	1
													3	2	1	4		Somewhat polluted and causes harm		1.8	-0.2	-0.2	1	1	-0.2	-0.2	-0.2	-0.2	1	2.7	2.66667	4	1	4	3	2	4	5	1	1	3	4	3	2	1	3	2	1	4
													4	1	2	3		Somewhat polluted but causes no harm	It's okay. Intermittent haze mainly caused by random open burning by residents.	4.2	-0.2	-0.2	1	1	-0.2	-0.2	1	1	1	3.6	3.55556	5	3	4	3	3	5	5	3	2	3	4	5	4	4	3	3	3	2
													1	2	3	4		Somewhat polluted but causes no harm	Occasional haze	4	1	0	1	0	0	0	1	1	0	3.4	3.38889	4	3	4	2	5	5	4	3	3	4	2	3	4	3	3	4	3	2
													3	4	1	2		Somewhat polluted but causes no harm	smells like smoke on near the roads, but other places cant really feel the difference	6.8	1	-0.2	1	1	1	1	0	1	1	3	3	3	2	2	1	3	5	4	1	2	2	2	4	4	4	4	5	4	2
													3	4	2	1		Somewhat polluted but causes no harm	One visible way for me to judge on air quality would be haze but generally KL area doesn't actually suffer from bad haze, only a mild haze which I don't think will cause grevious harm to human health. I don't have any other parameter to judge the air quality besides observation	4.8	1	-0.2	1	0	0	1	0	1	1	3.4	3.38889	1	3	5	3	4	5	4	4	4	3	5	2	3	3	4	4	2	2
													3	4	1	2		Severely polluted	Hazy	4.6	1	0	-0.2	1	0	-0.2	1	1	1	2.8	2.83333	4	1	4	2	4	5	4	1	2	2	4	4	2	4	2	4	1	1
													3	4	2	1		Somewhat polluted but causes no harm		4.2	-0.2	-0.2	-0.2	-0.2	1	1	1	1	1	3.3	3.27778	4	2	5	4	2	5	5	2	4	4	1	3	3	2	4	4	4	1
													3	4	2	1		Somewhat polluted but causes no harm		3.6	1	-0.2	1	0	0	-0.2	1	0	1	2.7	2.66667	3	4	3	2	5	4	4	2	2	1	2	4	4	2	2	2	1	1
													4	3	2	1		Somewhat polluted but causes no harm	Varies according to different hours throughout the day.	4.2	-0.2	-0.2	1	1	-0.2	1	-0.2	1	1	2.9	2.88889	4	1	3	4	4	5	4	1	2	2	3	5	1	2	2	4	1	4
													4	2	3	1		Somewhat polluted and causes harm		2.4	0	-0.2	-0.2	-0.2	0	1	0	1	1	4.1	4.05556	5	4	4	3	4	5	5	3	5	3	5	5	4	4	4	3	4	3
													3	4	2	1		Somewhat polluted but causes no harm		3.6	0	-0.2	1	0	-0.2	0	1	1	1	3.2	3.22222	4	2	3	2	4	5	5	2	2	2	3	2	3	4	2	5	4	4
													3	2	4	1		Somewhat polluted but causes no harm		3.8	0	0	1	1	0	-0.2	0	1	1	3.4	3.44444	4	3	5	3	3	5	4	4	4	2	2	2	4	2	4	4	3	4
													3	4	1	2		Somewhat polluted but causes no harm	Located next to LDP & SKVE Highway, thus, high motor vehicles emmisions due to very high traffic especially during peak hours.	2.4	0	-0.2	1	0	-0.2	-0.2	1	1	0	2.5	2.5	3	2	3	2	4	4	3	1	2	2	2	4	3	2	2	3	2	1
													4	3	1	2		Somewhat polluted but causes no harm		6.8	1	-0.2	1	1	0	1	1	1	1	3.1	3.11111	3	2	4	3	4	5	3	3	4	3	2	1	3	2	4	5	2	3
													4	3	2	1		Somewhat polluted but causes no harm	There are days where it is clear but also days when a light smog can be seen. On days like that, my asthma isn't triggered.	7	1	0	1	1	0	1	1	1	1	3.4	3.38889	4	4	3	4	4	5	2	2	4	2	4	3	4	5	4	4	1	2
													1	4	3	2		Somewhat polluted but causes no harm	There are a few warehouse near my area with many big lorries moving in and out.	1.4	-0.2	-0.2	0	1	0	-0.2	0	1	0	3.1	3.11111	4	1	3	3	4	5	4	3	2	2	4	4	4	2	2	5	3	1
													3	2	4	1		Somewhat polluted and causes harm	Many people has been getting flu, cough, lung and throat infection. These are all mainly influenced by air pollution.	6.8	1	-0.2	1	1	1	1	1	1	0	2.8	2.83333	4	4	2	2	4	4	2	2	2	2	4	5	2	4	3	2	1	2
													3	1	2	4		Somewhat polluted and causes harm	Dusty and hazy	2.6	0	-0.2	-0.2	1	0	1	0	1	0	2.9	2.94444	4	4	3	1	2	5	4	1	2	2	4	5	4	1	3	4	1	3
													4	3	1	2		Not polluted at all		3.6	1	-0.2	0	0	0	-0.2	1	1	1	3.4	3.38889	4	1	4	3	4	5	5	4	5	4	1	3	5	1	4	3	2	3
													3	4	1	2		Somewhat polluted but causes no harm	It is polluted	2.6	0	-0.2	0	0	-0.2	0	1	1	1	3.6	3.55556	5	4	3	3	4	5	5	1	4	4	3	5	3	3	4	4	3	1
													1	2	3	4		Severely polluted		1.8	-0.2	-0.2	-0.2	-0.2	-0.2	1	-0.2	1	1	2.9	2.94444	3	4	1	3	3	3	3	5	3	3	2	3	3	3	3	3	1	4
													3	2	4	1		Somewhat polluted and causes harm	The air quality is very poor due to daily usage of fuels. Thus, if one can reduce the usage of own transport and opt for public transport such as trains and busses, the air pollution level can be controlled and we can have better environment.	3.6	0	-0.2	0	1	0	1	1	1	-0.2	3.6	3.61111	5	2	3	4	1	5	5	5	3	5	5	3	3	2	3	4	4	3
													3	4	1	2		Somewhat polluted and causes harm	A visible unhealthy dense air while walking in the streets of KL	5.4	1	-0.2	-0.2	1	-0.2	1	1	1	1	3.1	3.11111	4	3	2	2	2	5	4	2	3	4	1	4	4	3	3	4	4	2
													2	3	1	4		Somewhat polluted and causes harm	There is lack of plants and tress that could filter the air and so the air smell is not pure.	6.8	1	-0.2	0	1	1	1	1	1	1	3.7	3.66667	5	3	5	3	3	5	5	5	4	4	4	1	5	1	5	3	2	3
													3	2	4	1		Somewhat polluted and causes harm	The air quality is indefinite. It's never a constant blue sky through out the year or month. the air is always contaminated causing eyes irritation as well asthma.	3.4	1	-0.2	-0.2	1	-0.2	1	1	0	0	3.1	3.11111	5	1	3	4	1	5	5	1	4	3	2	5	3	2	3	3	3	3
													1	2	3	4		Somewhat polluted but causes no harm		0	0	-0.2	-0.2	-0.2	-0.2	-0.2	0	1	0	3.4	3.44444	5	4	4	2	3	5	4	1	3	2	4	4	4	4	4	3	3	3
													1	2	3	4		Somewhat polluted but causes no harm		4.2	1	-0.2	-0.2	-0.2	1	1	-0.2	1	1	2.7	2.72222	3	3	1	1	4	4	4	1	2	2	2	3	1	4	1	4	4	5
													3	4	2	1		Somewhat polluted but causes no harm		3.8	-0.2	0	0	1	1	0	1	1	0	3.2	3.22222	4	1	3	2	5	5	5	3	5	2	4	2	3	5	3	4	1	1
													1	4	2	3		Somewhat polluted and causes harm	air quality is a measurement of standard of respired air which may be contaminated with poisonous particle or it is clear and safe to respire.	4.4	1	-0.2	-0.2	-0.2	1	0	1	1	1	3.4	3.38889	5	2	4	3	2	5	5	3	3	4	3	2	4	2	3	5	4	2
													2	1	3	4		Somewhat polluted but causes no harm		4.2	-0.2	-0.2	1	-0.2	-0.2	1	1	1	1	3	3.33333	4	2	4	5	2	5	2	4	5	4	1	1	4	1	4	5	5	2
													2	1	3	4		Somewhat polluted but causes no harm		4.2	-0.2	-0.2	1	-0.2	-0.2	1	1	1	1	3.2	3.16667	4	2	4	4	2	4	1	4	5	4	1	2	4	2	4	4	4	2
													4	2	3	1		Somewhat polluted but causes no harm		1.4	-0.2	-0.2	-0.2	0	0	1	0	0	1	3.3	3.33333	4	3	3	3	3	5	5	3	4	3	3	3	3	4	3	2	3	3
													2	1	3	4		Somewhat polluted and causes harm		4.2	1	1	-0.2	1	-0.2	1	-0.2	-0.2	1	3.7	3.66667	4	3	4	5	2	4	2	4	5	5	4	3	3	3	4	4	5	2
													1	2	3	4		Somewhat polluted but causes no harm		3	1	-0.2	1	-0.2	-0.2	-0.2	-0.2	1	1	2.7	2.72222	4	2	3	2	4	4	4	2	3	2	2	2	2	2	2	4	3	2
													2	1	3	4		Somewhat polluted but causes no harm		4.2	-0.2	-0.2	1	-0.2	-0.2	1	1	1	1	2.9	2.88889	4	2	3	4	3	5	2	3	4	3	1	2	3	1	3	4	4	1
													2	1	3	4		Somewhat polluted but causes no harm		4.2	-0.2	-0.2	1	-0.2	-0.2	1	1	1	1	3.2	3.16667	4	2	3	4	2	5	2	4	5	4	1	1	4	1	4	5	5	1
													2	1	4	3		Somewhat polluted but causes no harm	I live in the city so there's always a lot of cars, lorries, busses etc. There are also quite a number of factories in the area that contributes to air pollution. However, the condition is not really severe as you don't see any effect. But it may have a negative impact in the long run.	1.8	1	-0.2	0	0	0	0	0	1	0	3.6	3.55556	4	4	4	2	4	5	4	3	3	3	4	4	4	3	4	4	2	3
													1	3	2	4		Somewhat polluted but causes no harm	Polluted	3	0	0	0	0	0	1	0	1	1	3.2	3.16667	4	2	4	2	4	4	4	3	3	2	3	3	4	2	4	4	2	3
													2	1	3	4		Somewhat polluted and causes harm		4.2	-0.2	-0.2	1	-0.2	-0.2	1	1	1	1	3.4	3.44444	4	3	4	2	4	5	4	4	2	2	4	4	3	4	4	5	3	1
													3	2	1	4		Not polluted at all		5.6	0	-0.2	-0.2	1	1	1	1	1	1	3.2	3.22222	4	1	4	2	4	4	5	1	5	3	3	2	4	4	3	5	2	2
													3	2	4	1		Somewhat polluted and causes harm		5.4	1	1	-0.2	1	-0.2	1	1	-0.2	1	3.1	3.11111	3	3	3	4	2	5	1	4	4	4	1	2	4	1	5	4	3	3
													2	1	3	4		Somewhat polluted and causes harm		4.2	1	1	-0.2	1	-0.2	1	-0.2	1	-0.2	3.3	3.27778	4	2	4	4	2	4	3	5	5	3	3	3	3	2	3	4	4	1
													4	3	2	1		Somewhat polluted and causes harm		2.4	-0.2	-0.2	1	0	0	-0.2	0	1	1	3.3	3.33333	4	4	4	4	4	4	4	2	2	2	3	4	4	3	4	3	3	2
													2	1	3	4		Severely polluted		4.2	-0.2	-0.2	1	-0.2	-0.2	1	1	1	1	3.3	3.33333	4	3	4	5	1	4	2	4	4	5	3	1	5	1	3	2	4	5
													2	1	3	4		Somewhat polluted but causes no harm		4.2	-0.2	-0.2	1	-0.2	-0.2	1	1	1	1	3.3	3.27778	4	2	4	5	2	5	3	4	5	3	3	2	3	1	3	4	5	1
													2	1	3	4		Somewhat polluted but causes no harm		4.2	-0.2	-0.2	1	-0.2	-0.2	1	1	1	1	3.1	3.05556	3	2	2	4	4	5	4	2	5	2	1	1	2	4	2	5	5	2
													2	1	3	4		Severely polluted		4.2	-0.2	-0.2	1	-0.2	-0.2	1	1	1	1	3.2	3.16667	4	2	5	3	2	4	2	4	5	3	2	2	5	1	4	3	4	2
													1	2	3	4		Severely polluted		5.4	1	1	1	1	1	-0.2	1	-0.2	-0.2	3	3	3	3	3	3	3	3	3	3	3	3	3	3	3	3	3	3	3	3
													1	2	3	4		Somewhat polluted and causes harm		4.2	-0.2	-0.2	1	-0.2	-0.2	1	1	1	1	2.9	2.88889	4	1	4	3	2	4	1	4	4	4	1	1	4	2	5	2	2	4
													2	1	3	4		Severely polluted		4.2	-0.2	-0.2	1	-0.2	-0.2	1	1	1	1	3.6	3.61111	4	2	5	4	3	4	2	4	4	5	3	2	5	2	4	4	5	3
													2	1	3	4		Somewhat polluted and causes harm		4.2	-0.2	-0.2	1	-0.2	-0.2	1	1	1	1	3.2	3.22222	4	2	4	4	2	4	2	4	4	4	2	2	4	2	4	4	4	2
													2	1	3	4		Somewhat polluted but causes no harm		4.2	-0.2	-0.2	1	-0.2	-0.2	1	1	1	1	3	3	3	2	3	4	3	5	2	3	5	3	1	2	3	2	3	4	4	2
													1	2	3	4		Somewhat polluted and causes harm		4.2	1	-0.2	1	-0.2	-0.2	1	1	1	-0.2	3	3	3	5	1	2	2	5	2	5	4	5	2	1	4	1	3	4	4	1
													1	4	2	3		Somewhat polluted but causes no harm		3.4	-0.2	-0.2	1	1	-0.2	0	1	1	0	3.6	3.55556	5	3	5	3	4	5	4	3	3	3	5	1	5	3	3	5	1	3
													2	1	3	4		Somewhat polluted but causes no harm		4.2	-0.2	-0.2	1	-0.2	-0.2	1	1	1	1	3.3	3.27778	5	2	5	4	1	4	1	4	5	4	1	2	5	2	4	4	4	2
													2	1	3	4		Severely polluted		5.4	1	-0.2	1	1	-0.2	-0.2	1	1	1	3.1	3.05556	1	4	3	4	1	1	4	3	4	5	5	4	3	2	5	1	2	3
													2	1	3	4		Somewhat polluted but causes no harm		4.2	1	-0.2	1	1	-0.2	-0.2	-0.2	1	1	3	3	2	3	4	5	5	2	3	4	5	1	4	3	4	1	1	2	3	2
													2	1	3	4		Somewhat polluted but causes no harm		4.2	1	-0.2	1	1	-0.2	1	-0.2	-0.2	1	2.9	2.94444	3	2	5	1	4	3	2	5	1	2	3	2	5	5	2	3	4	1
													2	1	3	4		Severely polluted		4.2	1	-0.2	1	1	-0.2	-0.2	1	1	-0.2	2.4	2.44444	4	1	1	2	3	4	1	1	2	3	2	1	1	4	3	4	5	2
													3	1	2	4		Somewhat polluted but causes no harm		6.6	1	-0.2	1	1	-0.2	1	1	1	1	3.4	3.38889	5	5	2	3	2	5	5	2	3	4	1	5	2	3	4	5	1	4
													2	1	3	4		Severely polluted		5.4	1	-0.2	1	-0.2	-0.2	1	1	1	1	2.9	2.94444	3	2	5	1	4	3	2	5	1	2	3	2	5	5	2	3	4	1
													2	1	3	4		Severely polluted		6.6	1	-0.2	1	1	1	-0.2	1	1	1	3.4	3.38889	5	5	2	3	2	5	5	2	3	4	1	5	2	3	4	5	1	4
													2	1	3	4		Somewhat polluted but causes no harm		6.6	1	1	1	1	-0.2	-0.2	1	1	1	3.1	3.05556	1	4	3	4	1	1	4	3	4	5	5	4	3	2	5	1	2	3
													3	2	4	1		Somewhat polluted but causes no harm		5.4	1	-0.2	-0.2	1	-0.2	1	1	1	1	2.9	2.94444	3	2	5	1	4	3	2	5	1	2	3	2	5	5	2	3	4	1
													1	2	4	3		Somewhat polluted but causes no harm		3.2	-0.2	-0.2	-0.2	0	1	-0.2	1	1	1	2.6	2.61111	4	2	4	2	2	4	2	2	2	2	2	2	4	2	2	5	2	2
													1	2	3	4		Severely polluted		3	1	1	-0.2	1	-0.2	-0.2	-0.2	-0.2	1	3.1	3.05556	1	4	3	4	1	1	4	3	4	5	5	4	3	2	5	1	2	3
													2	1	3	4		Somewhat polluted but causes no harm	It can be severely polluted during haze. Other times, the air quality is just fine.	4.6	1	-0.2	1	0	-0.2	1	0	1	1	3.4	3.44444	5	4	4	2	3	5	5	2	3	1	5	5	3	4	4	3	1	3
													3	4	1	2		Somewhat polluted but causes no harm	Kualiti udara just nice but haze make it worst	4.2	-0.2	-0.2	1	1	-0.2	-0.2	1	1	1	3.7	3.72222	5	2	4	2	5	5	5	3	5	2	5	4	3	4	3	4	2	4
													4	2	3	1		Somewhat polluted but causes no harm	very little industrial pollution. the place is some what rural so you see little cars	2.2	0	-0.2	-0.2	0	-0.2	1	-0.2	1	1	3.7	3.66667	5	4	3	2	5	5	4	4	3	2	5	5	4	2	4	4	2	3
													4	3	1	2		Somewhat polluted but causes no harm		3.6	1	-0.2	1	0	0	1	0	-0.2	1	3.3	3.33333	4	5	2	3	3	5	4	1	3	4	5	5	3	3	2	3	2	3
													4	2	3	1		Somewhat polluted but causes no harm		5.4	1	-0.2	-0.2	1	-0.2	1	1	1	1	3.6	3.61111	4	3	4	2	3	5	4	3	3	5	4	3	4	4	4	4	3	3
													2	4	1	3		Somewhat polluted but causes no harm	Dirty	3.6	-0.2	-0.2	1	0	0	0	1	1	1	3.2	3.22222	5	4	3	2	5	5	2	3	4	3	2	4	4	3	4	3	1	1
													3	4	1	2		Somewhat polluted but causes no harm		5.4	1	-0.2	1	1	-0.2	-0.2	1	1	1	3.2	3.16667	5	1	5	5	4	5	2	2	1	5	1	5	3	1	3	3	2	4
													4	1	2	3		Somewhat polluted but causes no harm		2.4	0	-0.2	1	0	-0.2	-0.2	1	1	0	3.2	3.16667	4	1	3	2	3	5	4	2	3	3	4	4	4	3	3	3	3	3
													2	3	4	1		Somewhat polluted but causes no harm	Good air quality but it becomes worse when incident takes place such as lorry passing by, air plouution from poultry farm, haze, open burning of rubbish from some local residents	5.4	1	-0.2	1	1	-0.2	-0.2	1	1	1	3.7	3.66667	4	2	4	3	4	5	5	2	3	3	5	5	4	2	4	4	3	4
													4	3	2	1		Somewhat polluted but causes no harm	Generally quite well compared to other parts of Malaysia. Air is quite fresh during late night.	5.4	1	-0.2	1	1	-0.2	-0.2	1	1	1	3.9	3.88889	4	3	5	3	4	5	5	4	4	3	5	4	4	3	4	4	2	4
													4	3	1	2		Somewhat polluted but causes no harm	It is not consistent and can be affected by neighbouring country if there is forest fire. Vehicle emission causes problem especially in the city, and affect people health directly because people walking on the roadside is directly exposed to the gas emitted.	6.6	1	-0.2	1	1	1	1	1	1	-0.2	3.3	3.33333	3	3	4	3	4	5	4	3	2	2	4	5	3	3	3	5	2	2
													3	1	2	4		Somewhat polluted but causes no harm		4.4	0	-0.2	-0.2	1	1	-0.2	1	1	1	3.1	3.05556	1	2	5	2	5	4	3	4	2	2	4	5	2	2	3	2	4	3
													2	4	3	1		Not polluted at all		1	0	0	0	0	0	0	0	1	0	3.5	3.5	4	3	4	3	2	4	5	3	3	3	4	5	3	4	4	4	3	2
													4	3	1	2		Not polluted at all		4.8	1	0	-0.2	0	0	1	1	1	1	3.1	3.11111	3	3	4	2	4	4	2	3	4	3	2	3	3	3	3	4	3	3
													1	2	3	4		Somewhat polluted and causes harm	Normally consider okay, people still can have normal daily activity. Whenever until the haze period, tt's really annoying and terrible condition for all of us to having outdoor activities.	2.6	1	-0.2	1	0	-0.2	0	0	0	1	3.4	3.38889	5	4	4	2	3	5	5	4	4	3	1	4	3	2	4	3	3	2
